# Supplementary material for: Wenn der Schock anhält
Source: Springer Nature journal article supplement (doi:10.1007/s41906-024-2625-9), 2024-05-01
Supplement: MOESM1 [file 27101864]

## Literatur

### zum Beitrag „Wenn der Schock anhält“

von Jenny Kubitzka, Andrea Forster, Dominik Hinzmann

*PflegeZeitschrift* (77) 6/2024, S. 59-61

- Basse-Sprung A (2023) Sekundäre Traumatisierung – welche Möglichkeiten bestehen, Auszubildende zur/zum Pflegefachfrau/-mann zu schützen? <https://opus.bsz-bw.de/msh/frontdoor/index/index/docId/161> (Letzter Zugriff: 30.12.2023)
- bibb (k.A.) Erste Hilfe bei Schwierigkeiten in der generalistischen Pflegeausbildung. <https://www.bibb.de/de/177005.php> (Letzter Zugriff: 16.01.2024)
- Chachula K (2021) Professional quality of life factors and relationships in nursing and psychiatric nursing students: an exploratory study. *SAGE Open Nurs.* 7 e23779608021994394.
- Dugué M, Dosseville F (2018) Understanding nursing student stress and its consequences: a qualitative study in France. *BAOJ Med. Nurs.* 4 (4) 1-8.
- ERNST (2020) About ERNST. <https://cost-ernst.eu/about/> (Letzter Zugriff: 16.01.2024)
- Gandossi C, De Brasi EL, Rosa D, Maffioli S, Zappa S, Villa G, Manara DF (2023) How do nursing students perceive moral distress? An interpretative phenomenological study. *Nurs. Rep.* 13 (1) 539-548.
- Garcia-Gonzalez D, Peters M (2021) Ausbildungs- und Studienabbrüche in der Pflege- ein integratives Review. <https://www.bibb.de/dienst/publikationen/de/17573> (Letzter Zugriff: 30.12.2023)
- Hanson J, McAllister M (2017) Preparation for workplace adversity: student narratives as a stimulus for learning. *Nurse Educ. Pract.* 25, 89-95.
- Hinzmann D, Zehentner P, Koll-Krüsmann M (2022) Den Belastungen die Spitze nehmen. Zur strukturierten Prävention und Stressreduktion für Personal in der Akut-, Notfall- und Intensivmedizin. In S Kluge, M Heringlake, G Marx, H-J Busch (Hrsg), *DIVI Jahrbuch 2021|2022. Schwerpunkt Krisenmanagement* (S 35-40). Medizinische Wissenschaftliche Verlagsgesellschaft, Berlin.
- Hood TL, Copeland D (2021) Student nurses' experiences of critical events in the clinical setting: a grounded theory. *J. Prof. Nurs.* 37 (5) 885-893.
- Koll-Krüsmann M (2016) Trama-Awareness und Psychoedukation. Internationale DAAD Akademie, Bonn.
- Krey H (2003) *Ekel ist okay. Ein Lern- und Lehrbuch zum Umgang mit Emotionen in Pflegeausbildung und Pflegealltag.* Schlütersche Verlagsgesellschaft, Hannover.
- Krüsmann M, Metz A, Kühling M, Seifert L, Süß B, Butollo W (2008) Untersuchung des langfristigen Adaptionsprozesses nach unterschiedlichen Nachsorgemaßnahmen im Kontext von Katastrophen und extrem belastenden Einsätzen. [www.einsatzkraft.de/Langzeitstudie.pdf](http://www.einsatzkraft.de/Langzeitstudie.pdf) (Letzter Zugriff: 16.01.2024)
- Loos T, Willetts G, Kempe AG (2014) A sudden death on clinical placement: a student's perspective of nurse grief. *Contemp. Nurse* 47 (1-2) 190-196.
- Mathias CT, Wentzel DL (2017) Descriptive study of burnout, compassion fatigue and compassion satisfaction in undergraduate nursing students at a tertiary education institution in KwaZulu-Natal. *Curationis* 40 (1) 1-6.

- Mayer KA, Linehan KJ, MacMillan NK (2022) Student perspectives on potential sources of trauma exposure during nursing school. *Nurs. Forum* 57 (5) 833-842.
- McCarthy B, Trace A, O'Donovan M, O'Regan P, Brady-Nevin C, O'Shea M, Martin A-M, Murphy M (2017) Coping with stressful events: a pre-post-test of a psycho-educational intervention for undergraduate nursing and midwifery students. *Nurs. Educ. Today* 61, 273-280.
- Mittermeier I, Sirrenberg M, Weinhhammer V, Quartucci C, Herr C, Heinze S (2023) Prävention von Beanspruchungsfolgen aufgrund psychischer Belastungen in Pflege und Medizin. Ein Handlungsleitfaden für Pflegekräfte und Medizinische Fachangestellte sowie Leitungen und Träger.  
[https://www.lgl.bayern.de/downloads/arbeitschutz/arbeitspsychologie/doc/pelican\\_projekt.pdf](https://www.lgl.bayern.de/downloads/arbeitschutz/arbeitspsychologie/doc/pelican_projekt.pdf) (Letzter Zugriff: 12.01.2024)
- PSU-Akut e. V. (2024) Vorsorge, Schulung, Akutintervention und Forschung im Bereich Psychosozialer Unterstützung (PSU) im Gesundheitswesen. <https://www.psu-akut.de> (Letzter Zugriff: 17.01.2024)
- Rall M (2021) Die Bedeutung von Human Factors, Crew Resource Management und einer guten Sicherheitskultur zur Prävention des Second Victim Phänomens. In R Strametz & Aktionsbündnis Patientensicherheit e.V. (Hrsg.), *Mitarbeitersicherheit ist Patientensicherheit: Psychosoziale Unterstützung von Behandelnden im Krankenhaus* (S 43–55). W. Kohlhammer Verlag, Stuttgart.
- Sahay A, McKenna L (2023) Nurses and nursing students as second victims: a scoping review. *Nurs. Outlook* 71 (4) e101992.
- Shorter M, Stayt LC (2009) Critical care nurses' experiences of grief in an adult intensive care unit. *J. Adv. Nurs.* 66 (1) 159-167.
- Strametz R, Fendel JC, Koch, P, Roesner H, Zilezinski M, Bushuven S, Raspe M (2021) Prevalence of second victims, risk factors, and support strategies among German nurses (SeViD-II Survey). *Int. J. Environ. Res. Public Health* 18 (20) e10594.
- Sung KM, Park SA, Oh EJ, Lee SM, Lee SY (2018) Traumatic experiences and posttraumatic growth of nursing students who were in the clinical training. *J. Digit. Converg.* 16 (12) 489-503.
- Vanhaecht K, Seys D, Russotto S, Strametz R, Mira J, Sigurgeirsdóttir S, Wu AW, Pölluste K, Popovici DG, Sfetcu R, Kurt S, Panella M, European Researches' Network Working on Second Victims (2022) An evidence and consensus-based definition of second victim: a strategic topic in healthcare quality, patient safety, person-centeredness and human resource management. *Int. J. Environ. Res. Public Health* 19 (24) e19869.
- Winter C (2019) Emotionale Herausforderungen Auszubildender während der praktischen Pflegeausbildung. Empirische Grundlegung eines persönlichkeitsstärkenden Praxisbegleitungskonzepts. <https://www.repo.uni-hannover.de/handle/123456789/9221> (Letzter Zugriff: 30.12.2023)
